1 **Physiological and genetic drivers underpinning canopy development are associated with**  
2 **durum wheat yield in rainfed environments**

3 Yichen Kang<sup>1</sup>, Shanice V. Haeften<sup>1</sup>, Daniela Bustos-Korts<sup>2</sup>, Stjepan Vukasovic<sup>3</sup>, Sana Ullah Khan<sup>1</sup>,  
4 Jack Christopher<sup>4</sup>, Karine Chenu<sup>4</sup>, Jason A. Able<sup>5</sup>, Millicent R. Smith<sup>1,6</sup>, Kai P. Voss-Fels<sup>1</sup>, Andries B.  
5 Potgieter<sup>7</sup>, David R. Jordan<sup>8</sup>, Andrew K. Borrell<sup>8</sup>, Samir Alahmad<sup>1\*</sup> and Lee T. Hickey<sup>1\*</sup>

6 <sup>1</sup>Centre for Crop Science, Queensland Alliance for Agriculture and Food Innovation, The University of  
7 Queensland, Brisbane, QLD, Australia

8 <sup>2</sup>Biometris, Wageningen University and Research Centre, Wageningen, Netherlands

9 <sup>3</sup>Institute of Agronomy and Plant Breeding, Justus Liebig University Giessen, Hesse, Germany

10 <sup>4</sup>Centre for Crop Science, Queensland Alliance for Agriculture and Food Innovation, The University of  
11 Queensland, Toowoomba, QLD, Australia

12 <sup>5</sup>School of Agriculture, Food & Wine, Waite Research Institute, The University of Adelaide, Urrbrae,  
13 SA, Australia

14 <sup>6</sup>School of Agriculture and Food Sciences, Faculty of Science, The University of Queensland, Gatton,  
15 QLD, Australia

16 <sup>7</sup>Centre for Crop Science, Queensland Alliance for Agriculture and Food Innovation, The University of  
17 Queensland, Gatton, QLD, Australia.

18 <sup>8</sup> Centre for Crop Science, Queensland Alliance for Agriculture and Food Innovation, The University  
19 of Queensland, Hermitage Research Facility, Warwick, QLD, Australia

20 \*Correspondence: Samir Alahmad, [s.alahmad@uq.edu.au](mailto:s.alahmad@uq.edu.au)

21 Lee T. Hickey, [l.hickey@uq.edu.au](mailto:l.hickey@uq.edu.au)

## 22 **Abstract**

23 Durum wheat (*Triticum turgidum* L. ssp. *Durum*) is largely grown in rainfed production  
24 systems around the world. New cultivars with improved adaptation to water-limited  
25 environments are required to sustain productivity in the face of climate change. Physiological  
26 traits related to canopy development underpin the production of biomass and yield, as they  
27 interact with solar radiation and affect the timing of water use throughout the growing season.  
28 Despite their importance, there is limited research on the relationship between canopy  
29 development and yield in durum wheat, in particular studies exploring temporal canopy  
30 dynamics under field conditions. This study reports the genetic dissection of canopy  
31 development in a durum wheat nested-association mapping population evaluated for  
32 longitudinal normalized difference vegetation index (NDVI) measurements. Association  
33 mapping was performed to identify quantitative trait loci (QTL) for time-point NDVI and  
34 spline-smoothed NDVI trajectory traits. Yield effects associated with QTL for canopy  
35 development were explored using data from four rainfed field trials. Four QTL were associated  
36 with yield in specific environments, and notably, were not associated with a yield penalty in  
37 any environment. Alleles associated with slow canopy closure increased yield. This was likely  
38 due to a combined effect of optimised timing of water-use and pleiotropic effects on yield  
39 component traits, including spike number and spike length. Overall, this study suggests that  
40 slower canopy closure is beneficial for durum wheat production in rainfed environments.  
41 Selection for traits or loci associated with canopy development may indirectly improve yield  
42 and support selection for more resilient and productive cultivars in water limited environments.

43 **Keywords:** association mapping, drought, marker-environment interaction, NDVI,  
44 phenotyping, water stress

## 45 Abbreviations

|             |                                        |
|-------------|----------------------------------------|
| <b>AUC</b>  | area under the curve                   |
| <b>BLUE</b> | best linear unbiased estimate          |
| <b>DAS</b>  | days after sowing                      |
| <b>DTF</b>  | days to flowering                      |
| <b>FDR</b>  | false discovery rate                   |
| <b>FGCC</b> | fractional green canopy cover          |
| <b>GS</b>   | Zadoks' growth stages                  |
| <b>MTA</b>  | marker–trait associations              |
| <b>NAM</b>  | nested-association mapping             |
| <b>NDVI</b> | normalised difference vegetation index |
| <b>PC</b>   | principal component                    |
| <b>PCA</b>  | principal component analysis           |
| <b>PH</b>   | plant height                           |
| <b>QTL</b>  | quantitative trait loci                |
| <b>SE</b>   | stem elongation                        |
| <b>SL</b>   | spike length                           |
| <b>SN</b>   | spike number per unit area             |
| <b>SNP</b>  | single nucleotide polymorphism         |
| <b>SS</b>   | seedling stage                         |
| <b>TL</b>   | tillering                              |

## 47 **Introduction**

48 Durum wheat, or pasta wheat (*Triticum turgidum* L. ssp. *Durum*;  $2n = 4x = 28$ ) is an ancient  
49 food crop and an important industry in Mediterranean and sub-tropical agricultural regions  
50 (Sall *et al.*, 2019). Production is often constrained by drought, during and post anthesis (Loss  
51 and Siddique, 1994). This can greatly reduce yield potential by limiting grain number and  
52 weight (Gevrek and Atasoy, 2012; Royo *et al.*, 2000). Therefore, traits with phenotypic  
53 plasticity are important for increasing crop productivity, as trait plasticity allows for adaptive  
54 potential in response to environmental variations (Borrell *et al.*, 2014; Maccaferri *et al.*, 2008;  
55 Matesanz *et al.*, 2020; Shavrukov *et al.*, 2017). Traditionally, durum wheat breeders have  
56 selected for earlier flowering (Bassi and Nachit, 2019; De Vita *et al.*, 2007; Miralles *et al.*,  
57 2002; Motzo *et al.*, 2010) to minimise the impact of end-of-season drought on reproduction  
58 and grain-filling.

59 In addition to optimising flowering time, canopy traits associated with improved water use  
60 efficiency can be targeted. For instance, changes in canopy development (e.g., reduction in leaf  
61 size or tillering) provide an advantage under terminal drought conditions by shifting water use  
62 from pre- to post-anthesis (Borrell *et al.*, 2014; George-Jaeggli *et al.*, 2017). Limited  
63 transpiration rate at high evaporative demand can also conserve water for critical stages later  
64 in crop development (Collins *et al.*, 2021). There is a fine balance between water supply and  
65 demand in crops and as such, the timing of water availability must be matched with  
66 phenological development. Although rapid canopy development can increase light interception  
67 (Regan *et al.*, 1997) and reduce soil evaporation (Lopez-Castaneda *et al.*, 1995), if there is  
68 insufficient stored soil moisture or in-crop rainfall, excessive canopy size may prematurely  
69 deplete soil water and exacerbate terminal drought (Nuttall *et al.*, 2012). Thus, crop  
70 performance under drought conditions depends on complex source-sink dynamics between  
71 carbohydrate and water balance, where there are trade-offs between stress resilience and yield  
72 (Collins *et al.*, 2021; Rodrigues *et al.*, 2019). Given the dynamic nature of the environment,  
73 understanding canopy development may help to identify integrative traits that support yield.

74 Normalized difference vegetation index (NDVI) is used to characterise canopy attributes and  
75 is considered a good surrogate for biomass accumulation, canopy cover and plant vigour  
76 (Cabrera-Bosquet *et al.*, 2011; Carlson and Ripley, 1997; Mullan and Reynolds, 2010; Xue and  
77 Su, 2017). NDVI, computed as the difference between near-infrared reflectance and red  
78 absorption divided by their sum, is influenced by leaf chlorophyll content and canopy

79 architecture (Gamon *et al.*, 1995). NDVI can be measured in a non-subjective and efficient  
80 manner which facilitates its use at the field level. The generalized NDVI profile captured during  
81 the growing season includes: (1) the green-up phase before canopy closure, also known as the  
82 exponential phase; (2) the peak canopy cover phase; and (3) the decline phase as leaves senesce  
83 (Brown and de Beurs, 2008; Masialeti *et al.*, 2010; Smith *et al.*, 1995; Soltani and Galeshi,  
84 2002). Hereafter, the term canopy development refers to the green-up and maximum cover  
85 phases.

86 While many studies have used NDVI to characterize canopy dynamics during the senescence  
87 phase (Christopher *et al.*, 2016; Christopher *et al.*, 2014; Lopes and Reynolds, 2012; Pinto *et*  
88 *al.*, 2016), few have explored canopy development and assessed its impact on yield. In durum  
89 wheat, genetic studies have mapped quantitative trait loci (QTL) using NDVI captured at  
90 certain developmental stages or specific time-points (Condorelli *et al.*, 2018; Shi *et al.*, 2017).  
91 However, NDVI captured at a specific time point does not account for the temporal dynamics  
92 of canopy development. This is important to consider, as the correlation between NDVI  
93 captured at a specific time-point and yield is strongly dependent on the growth stage (Goodwin  
94 *et al.*, 2018; Smith *et al.*, 1995; Teal *et al.*, 2006).

95 Alternatively, NDVI time-series data can be modelled, and features of the growth curve used  
96 to study the underlying genetics. In bread wheat and maize, longitudinal growth data has  
97 successfully captured trait development over time to reinforce QTL mapping power (Kwak *et*  
98 *al.*, 2016; Lyra *et al.*, 2020; Miao *et al.*, 2020; Muraya *et al.*, 2017). Different parameters of  
99 the growth curve related to the time period of interest, may be used to describe temporal NDVI  
100 dynamics, such as curve threshold values, inflection points and integrals (Bustos-Korts *et al.*,  
101 2019; Christopher *et al.*, 2014; Lopes and Reynolds, 2012; Pinto *et al.*, 2016). Considering the  
102 many environmental factors that can affect the canopy status, area under the respective curve  
103 summarises the cumulative changes and can provide a general assessment of canopy  
104 development. The approach is yet to be applied to study canopy development in durum wheat.

105 Understanding the genetics of adaptive traits like canopy development, and their interaction  
106 with the environment, is critical to support the development of new cultivars with improved  
107 adaptation (Hammer *et al.*, 2020). Using a nested-association mapping population, we reveal  
108 the genetic components of canopy development in durum wheat. To gain biological and  
109 physiological insights into NDVI time-sequential data, we first explored relationships between  
110 NDVI, phenology, canopy cover and features of the growth curve. Secondly, we performed

111 association mapping using both time-point NDVI and the area under the curve (AUC) for  
112 NDVI. Finally, markers associated with canopy development were used in a linear mixed  
113 model approach to investigate marker  $\times$  environment interactions and yield effects across  
114 multiple rainfed environments in Australia.

## 115 **Materials and methods**

### 116 **Plant materials and genotyping**

117 This study examined subsets of a durum wheat nested-association mapping (NAM) population  
118 developed at The University of Queensland, as described by Alahmad *et al.* (2019). The NAM  
119 population comprised 920 lines (10 families) generated by crossing eight elite lines from  
120 ICARDA Morocco (i.e. Fastoz2, Fastoz3, Fastoz6, Fastoz7, Fastoz8, Fastoz10, Outrob4 and  
121 Fadda98) as ‘founders’ to the Australian durum wheat cultivars Jandaroi and DBA Aurora,  
122 which served as ‘reference’ varieties. The founder lines were used as donors for drought  
123 adaptive attributes in durum wheat breeding programs in the Middle East and North Africa.  
124 The reference varieties are preferred by the pasta industry for their quality and therefore widely  
125 grown in Australia. The NAM population was genotyped using Diversity Arrays Technology  
126 genotyping-by-sequencing single nucleotide polymorphism (SNP) markers (Alahmad *et al.*,  
127 2019). Allele coding used 0, 1, and 2, where 0 is the reference allele homozygote, 1 is the SNP  
128 allele homozygote and 2 is the heterozygote.

### 129 **Field trials**

130 A subset of the durum wheat NAM population and a selection of Australian durum wheat  
131 varieties were evaluated in four rainfed field trials conducted in Australia between 2017 and  
132 2020 (Table 1), namely “2017\_RW” at Roseworthy (34.30 °S; 138.41 °E), South Australia;  
133 “2019\_TS” at Tosari, near Tummaville (27.51 °S; 151.27 °E), Queensland; and “2017\_WW”  
134 and “2020\_WW” at Warwick (28.12 °S; 152.06 °E), Queensland. The trials adopted partially  
135 replicated row-column designs (Cullis *et al.*, 2006), with the exception of 2017\_RW which  
136 used a randomized complete block design with three replicates. The total number of genotypes  
137 ranged from 147 to 309 across the trials, with pairs of trials having between 51 and 146  
138 genotypes in common. For all trials, starting fertilizer was applied at sowing so that nutrients  
139 were not limited, and weeds and insects were controlled as required. Based on the nearest

140 weather station to each trial site, weather information was acquired from the Bureau of  
141 Meteorology (<http://www.bom.gov.au/>) and the SILO database (Jeffrey *et al.*, 2001).

142 To monitor soil moisture and estimate the impact of drought stress on yield in the 2020\_WW  
143 trial, two check genotypes (DBA Aurora and Fadda98) were sown in dryland and irrigated  
144 blocks next to the main experiment. Both blocks were sown on the same day as the main trial.  
145 The rainfed block was adjacent to 2020\_WW and the irrigation block was adjacent to the  
146 rainfed block (separated by buffer rows to prevent lateral movement of soil moisture across  
147 treatments). Plot size was consistent with the main trial and each treatment was sown in a  
148 completely randomized block design, using 12 replicates in the dryland treatment and 6  
149 replicates in the irrigation treatment. About 20 mm of water was applied through drip tape  
150 irrigation every 1-2 weeks to ensure a stress-free growing environment. To determine soil water  
151 availability, soil water content was measured for both dryland and irrigated blocks at one week  
152 pre-anthesis and at anthesis. In each strip, two soil cores were collected from DBA Aurora and  
153 Fadda98 plots in both treatments. Each core was divided into 20cm soil layers: 0–20, 20–40,  
154 40–60, 60–80, 80–100, and 100–120 cm. A subsample from each soil layer was immediately  
155 weighed to obtain fresh weight, and then dried to a constant weight at 105 °C. Soil water  
156 content for each layer was calculated as [(fresh weight-dry weight)/dry weight]×100%.

## 157 **Data collection**

158 The 2020\_WW trial was subjected to intensive canopy phenotyping and resulting phenotypes  
159 were used for association mapping. The trial comprised 309 genotypes evaluated using a p-rep  
160 design (~38%) of 456 plots (6 m × 1.05 m, 4 rows) (Table 2). NDVI data was captured for each  
161 plot every 1-2 weeks, specifically 22, 29, 36, 43, 50, 63, 70, 78, 85, 91, 99 and 106 days after  
162 sowing (DAS) using a GreenSeeker<sup>TM</sup> handheld sensor (NTech Industries, Ukiah, CA, USA).  
163 Measurements were recorded on sunny and still days, by holding the sensor at approximately  
164 0.6 m height above the crop canopy of the central two rows while walking through the crop at  
165 a constant rate. Canopy cover images were also captured for all plots using a mobile phone  
166 camera (Apple iPhone10), at 29, 36, 43 and 50 DAS. The RGB images were processed using  
167 Canopeo in the Matlab environment, for calculating fractional green canopy cover (FGCC) that  
168 measures the canopy surface area (Patrignani and Ochsner, 2015). In each plot, the number of  
169 spikes was manually recorded for an inner row (1 m length) to determine spike number per unit  
170 area (SN) and spike length (SL) was recorded for six plants. Plant height (PH) of three random  
171 plants in each plot was measured at maturity from ground to the top of the spike, excluding the



172 awn length. Flowering time (DTF) was recorded as DAS to 50% flowering (Zadok's growth  
173 stage 65) of all plants in a plot (Zadoks *et al.*, 1974). The crop was harvested using a small-  
174 plot machine harvester to obtain yield data.

175 To investigate the relationship between NDVI and crop developmental stages in the 2020\_WW  
176 trial, a small panel of lines were selected for growth stage tracking from sowing to flag leaf  
177 emergence. The panel comprised 11 genotypes, which were selected based on divergent yield  
178 performance in previous rainfed yield trials (i.e., high yielding and low yielding lines). Each  
179 genotype was replicated 2-3 times in the trial (total 23 plots). Each plot was monitored for  
180 Zadoks' growth stages (GS) and 10 plants in the middle two rows of each plot were tagged for  
181 tracking tiller number until flag leaf emergence at 16, 22, 29, 36, 43, 50, 57, 63, 70, 78, and 85  
182 DAS.

183 To investigate yield effects of SNPs associated with canopy development, analyses used yield  
184 data from the 2020\_WW trial, plus data from the three other yield (2017\_WW, 2017\_RW and  
185 2019\_TS; Table 1). DTF was captured in all trials, except for 2017\_RW (Table 1).

## 186 **Analysis of phenotypic data**

187 Spatial analyses were conducted for each trait to correct for spatial heterogeneity within each  
188 trial. A linear mixed model was fitted in ASReml-R to estimate adjusted genotype means (best  
189 linear unbiased estimates; BLUEs) for all traits in each trial as follows (Butler *et al.*, 2009):

$$190 \quad y_{ijkm} = \mu + Rep_m + R_j + C_k + G_{i(m)} + e_{ijk(m)} \quad (1)$$

191 where  $y_{ijkm}$  denotes the plot observation of genotype  $i$  in replicate  $m$ , row  $j$  and column  $k$ , was  
192 modelled by fitting fixed effects for the overall mean ( $\mu$ ) and genotype  $i$  ( $G_{i(m)}$ ); and random  
193 effects for replicate  $m$  ( $Rep_m$ ), row  $j$  ( $R_j$ ) and column  $k$  ( $C_k$ ); and  $e_{ijk(m)}$  represents the vector  
194 of spatially correlated residuals. The variance components of  $R_j$ ,  $C_k$  and  $e_{ijk(m)}$  were assumed  
195 to follow  $R_j \sim N(0, \sigma_r^2)$ ,  $C_k \sim N(0, \sigma_c^2)$  and  $e_{ijk(m)} \sim N(0, AR1 \otimes AR1 \sigma^2)$ , respectively. To  
196 correct for known or expected sources of variation that were suspected to have some effects on  
197 traits, the model was tested to assess the need for fitting of covariates (i.e., differences in  
198 establishment between genotypes, lodging). The covariates and random terms were evaluated  
199 with Wald chi-squared test and likelihood ratio test, respectively. The model was adjusted  
200 according to the identified significant terms at  $\alpha = 0.05$ . Except for the replicate, non-significant



201 model terms were dropped in an attempt to obtain the best fit. Slight modifications were made  
202 for analysing 2017\_RW, where the residual term was modelled by a two-dimensional spatial  
203 model with correlation in row direction only.

204 Time-series modelling of canopy development used NDVI recorded from sowing to the peak  
205 of NDVI measures at 78 DAS (Fig. 1). To describe the trend of longitudinal BLUEs for NDVI,  
206 a smoothing spline was implemented in ASreml-R (Verbyla *et al.*, 1999). To summarize the  
207 NDVI growth curve, AUC was calculated using the following formula:

$$208 \quad AUC = \sum_{i=1}^n \left[ \frac{NDVI_{(i+1)} + NDVI_i}{2} \right] [T_{(i+1)} - T_i] \quad (2)$$

209 Where  $NDVI_i$  is the NDVI prediction at the  $i$ th DAS;  $T_i$  is the  $i$ th DAS; and  $n$  is the number of  
210 DAS of interest after  $i$ .

## 211 **Association mapping**

212 All data captured at the 2020\_WW trial were used to perform association mapping. Genotype  
213 data was subjected to quality control, which excluded genotypes with > 20% missing marker  
214 information and markers with a call rate < 90% and a minor allele frequency (MAF) < 5%.

215 Two different approaches were used to map QTL for canopy development. The first approach  
216 used BLUEs for NDVI at each time-point. The second approach used the AUC based on spline  
217 modelling of time series NDVI. Population structure was investigated using principal  
218 component analysis (PCA). An appropriate number of principal components (PCs) were  
219 determined by estimating the variances of PC scores. The retained PCs were included as  
220 covariates in association tests carried out with “FarmCPU” in R (Liu *et al.*, 2016). The  $p$ -values  
221 of marker–trait associations (MTA) were adjusted in a multiple comparison procedure using  
222 false discovery rate (FDR) (Benjamini and Hochberg, 1995). Only associations with adjusted  
223  $p$ -values ( $p_{\text{FDR}}$ ) less than 0.05 were considered as statistically significant and reported. For  
224 each QTL, the positive allele was determined as the allele associated with an increase in trait  
225 value. Data from each homozygous allele were tested for normality and homogeneity of  
226 variance. The means of genotypes carrying different homozygous alleles were statistically  
227 compared by independent t-tests. In several cases where data did not meet the normality criteria,  
228 non-parametric Wilcoxon rank sum test was performed to compare the allelic effect on traits.

## 229 **Marker × environment analysis**

230 The marker × environment interaction ( $M \times E$ ) was analysed with a linear mixed model, in a  
231 multi-environment context using all four field trials (Table 1):

$$232 \quad y = \mu + E + M + M \times E + G + G \times L + G \times Y + e \quad (3)$$

233 where  $y$  is the vector of yield BLUEs;  $\mu$  is the general mean;  $E$  represents trial;  $M$  denotes  
234 SNP;  $M \times E$  is the interaction term between SNP and trial;  $G$  is genotype;  $G \times L$  is the  
235 genotype by location interaction;  $G \times Y$  is the genotype by year interaction, and  $e$  is the  
236 residual, assumed independent with identical distribution. In the model,  $E$ ,  $M$ , and  $M \times E$   
237 were fixed effects, whereas  $G$ ,  $G \times L$  and  $G \times Y$  were treated as random effects.

238 The SNP effect was modelled as the sum of a main effect common to all tested environments  
239 ( $M$ ), plus the interaction term representing environments-specific deviations ( $M \times E$ ). Since  $M$   
240  $\times E$  was tested conditional on the main effect, no attempt was made to interpret the SNP main  
241 effect when  $M \times E$  is significant (Malosetti *et al.*, 2013). When  $M \times E$  is not significant, the  
242 SNP main effect could be sufficient to represent the SNP effect. After testing, only SNPs with  
243 either significant main effect or  $M \times E$  effects were reported and further investigated. The  
244 predicted means of each SNP allele × trial combination were compared with Tukey's HSD test.

245 A summary of the key steps and workflow involved from modelling NDVI time series data to  
246 the  $M \times E$  analysis is provided in Fig. 2.

## 247 **Results**

### 248 **Field environments experienced variable rainfall patterns**

249 The amount of in-crop rainfall varied across the four trials, ranging from 12.8 mm (2019\_TS)  
250 to 320.7 mm (2017\_RW). While 2019\_TS received the least in-crop rainfall (only 12.8 mm)  
251 the trial was sown into a full soil profile and the soil is described as deep with high water-  
252 holding capacity. This delayed water stress until the grain filling period and the site recorded  
253 the lowest mean yield (2.24 tonnes ha<sup>-1</sup>) in comparison with other trials (Fig. S4C, Table 1).  
254 The distribution of rainfall through the season also varied across the trials (Fig. S4). For  
255 example, 2017\_RW experienced a typical Mediterranean-type environment, where most  
256 rainfall occurred early in the season. In contrast, the two trials conducted at Warwick received

257 more rainfall during the critical grain filling period (Fig. S4B, D). The highest average yield  
258 was obtained in 2017\_WW, which was on average 1 tonne ha<sup>-1</sup> higher than 2017\_RW and  
259 2020\_WW, and 2.7 tonnes ha<sup>-1</sup> higher than 2019\_TS (Table 1).

260 To quantify the degree of water stress in the 2020\_WW canopy phenotyping trial, soil cores  
261 were sampled from dryland and irrigated strips adjacent to the main trial. Sampling performed  
262 one week prior to anthesis revealed significant differences in soil moisture (all soil depths from  
263 0 - 1.2 m) for the dryland treatment compared to the irrigated treatment (Fig. S7A). At anthesis,  
264 soil moisture was further depleted, particularly at depth (Fig. S7A). DBA Aurora and Fadda98  
265 obtained significantly higher yield in the irrigated treatment (Fig. S7B). Based on average yield  
266 differences between dryland and irrigated treatments, the degree of water stress experienced in  
267 the 2020\_WW trial resulted in an approximate average yield loss of 1.1 tonnes ha<sup>-1</sup>.

## 268 **Relationships between NDVI, phenology traits and yield-related traits**

269 The 309 NAM genotypes evaluated in 2020\_WW trial displayed a high degree of phenotypic  
270 variation for temporal NDVI (Fig. 1). Phenotypic variation in NDVI was largest at the  
271 beginning of the growing season, reached a peak at 36 DAS and reduced thereafter. The NDVI  
272 reached an average peak value of 0.9 at 78 DAS (Table 3). The Pearson correlation among all  
273 traits was computed (Fig. 3). For a specific time-point NDVI, its correlations with other  
274 timepoints decreased with increasing developmental stage. Positive correlations between  
275 NDVI and SL were significant at 29 and 78 DAS ( $p < 0.05$ ). A reverse trend was observed for  
276 SN, where NDVI in the early season (22 and 29 DAS) was negatively correlated with SN. For  
277 plant height, the only correlation with NDVI was evident at 50 DAS ( $p < 0.05$ ). Further, NDVI  
278 captured over time was negatively correlated with DTF (Fig. 3), with higher NDVI associated  
279 with faster time to flowering. No direct NDVI-yield relationship was found before 63 DAS in  
280 our study. Rather, NDVI recorded closer to flowering time was more highly related to final  
281 yield, as the strongest correlation between NDVI and yield was observed at 78 DAS ( $p < 0.001$ ).

## 282 **Modelling NDVI over time to estimate growth stages**

283 The longitudinal data fitted with a spline showed that the NDVI growth curves overall,  
284 increased slowly initially, then rapidly, before reaching a final plateau (Fig. 4). This suggested  
285 three different growth phases likely involved in canopy development in durum wheat. Although  
286 the trends of these curves were more or less in parallel over time, the distribution of genotype-  
287 specific NDVI trajectories indicated some heterogeneity in each phase, leading to variation in

288 phase-specific AUC traits. For this reason, the entire simulated AUC during the vegetative  
289 stage (AUC\_VS) could be divided into three phases, each illustrating a different growth status,  
290 to capture phase-specific variation that contributes to the overall canopy development.

291 To understand how NDVI dynamics reflected changes in vegetation phenology, 11 genotypes  
292 including 10 NAM lines and the reference variety DBA Aurora were investigated. Given the  
293 similar phenology of the 11 genotypes, Zadok's GS20 (start of tillering) and GS31 (first node)  
294 were aligned with 29 and 63 DAS (Fig. S1), respectively. Since no significant change was  
295 observed for the tiller number of most genotypes from 57-63 DAS (Fig. S1), Zadok's GS30  
296 (start of stem elongation) was estimated at 60 DAS. To evaluate the use of NDVI to define the  
297 growth stage, we hereafter used 30 and 60 DAS as two breakpoints to approximate GS20 and  
298 GS30, respectively.

299 Using 30 DAS as the first breakpoint, the NDVI trajectories of genotypes displayed two distinct  
300 growth patterns before and after the point. For instance, the sharp increase in NDVI after 30  
301 DAS suggested a transition from seedling to tillering stage. According to the fitted NDVI  
302 curves, most genotypes reached the start of maximum canopy cover at approximately 60 DAS  
303 (Fig. 4). This finding aligned with the start of the maximum canopy cover as indicated by time-  
304 point NDVI measures (Fig. 1), where NDVI after 63 DAS remained constant. As such, the  
305 estimated transition from tillering to stem elongation by the NDVI curve was deemed  
306 reasonably accurate. However, to further identify and interpret phenology metrics, the  
307 saturation issue may impact NDVI-based recommendations as NDVI becomes insensitive to  
308 changes in canopy structure when the crop reaches canopy closure.

### 309 **The relationship between time-point NDVI and AUC traits**

310 NDVI curves were binned into three growth stages: seedling stage (SS, 0-30 DAS), tillering  
311 stage (TL, 30-60 DAS) and stem elongation stage (SE, 60-78 DAS) (Fig. 4). Accordingly, the  
312 AUC traits for each stage were designated AUC\_SS, AUC\_TL and AUC\_SE, and were used  
313 to quantify the cumulative status for each stage. Given this, the same duration of each growth  
314 stage was applied to all studied genotypes. Hence, differences in growth rate appeared to  
315 contribute to variation in AUC, where higher AUC values represented faster canopy  
316 development and closure.

317 As expected, because of the linear nature of the operations involved, stage-specific AUC traits  
318 showed strong correlations with NDVI measured within the respective stage (Fig. 3). Moreover,  
319 stage-specific AUC traits were also found to correlate well with NDVI measured at other stages.  
320 The integral NDVI approach ensured that canopy differences related to yield formation were  
321 captured. For example, AUC\_SE was correlated with yield, but only some of the NDVI time-  
322 points during SE showed significant correlations with yield (e.g., 70 DAS was not correlated,  
323 but readings captured at 63 DAS and 78 DAS were, as shown in Fig. 3). These results  
324 highlighted the robustness and suitability of the approach for proceeding with genetic  
325 dissection studies.

### 326 **Time-point NDVI and AUC correlate with canopy cover**

327 NDVI displayed a positive linear relationship with FGCC before NDVI reached the maximum  
328 value of 0.9 (Fig. 5). Most genotypes obtained 80% FGCC at 50 DAS. Thus, rapid growth  
329 during the tillering stage could almost achieve canopy closure before the start of stem  
330 elongation. Moreover, all AUC traits showed significant correlations with FGCC, except for  
331 AUC\_SS (Fig. 3). This highlights the value of NDVI to estimate canopy cover as measures  
332 were similar to RGB-based estimates. As such, a higher NDVI and/or a greater AUC value  
333 represented a larger canopy that was faster to close.

### 334 **Association mapping for canopy development**

335 A total of 5,298 high-quality polymorphic SNP markers for 309 lines were used for association  
336 mapping. The PCA revealed six clusters in the NAM population (Fig. S2A), which aligned  
337 with the family structure (Table 2). The first five PCs were used as covariates in association  
338 mapping, because explained variance rapidly decreased until PC = 5 and changed little  
339 thereafter (Fig. S2B). The first two PCs explained ~ 23% of the genetic variance (Fig. S2B).

340 Association mapping was performed for time-point NDVI, stage-based AUC, crop phenology-  
341 related traits, spike traits and grain yield traits captured in the 2020\_WW trial. Using time-  
342 point NDVI, a total of 11 significant MTAs were detected across nine chromosomes, including  
343 2A, 2B, 3A, 4A, 4B, 5A, 6A, 6B and 7A (Table 4). Among these, only one SNP was detected  
344 for more than one NDVI time-point (i.e., SNP 1271404 on chromosome 2A). Notably, in  
345 agreement with the genetic variation in NDVI (Fig. 1), most MTAs were identified at specific  
346 time-points between 29 and 50 DAS.

347 To identify markers associated with AUC, we conducted association mapping using the  
348 following traits: AUC\_SS, AUC\_TL, AUC\_SE and AUC\_VS. This detected six significant  
349 MTAs, of which five were associated with more than one AUC trait. SNP 1271404 on  
350 chromosome 2A, was also detected using time-point NDVI measures during the TL growth  
351 stage. Mapping AUC enabled the identification of five additional signals, on chromosome 2A  
352 (SNP 4004899), 2B (SNPs 1095539 and 1108975), 4A (SNP 3946360) and 5B (SNP 1093322)  
353 (Table 4).

354 Interestingly, most MTAs for phenology-related traits were independent of MTAs associated  
355 with canopy development, except for SNP 2256343 on chromosome 2A which was associated  
356 with NDVI\_50DAS and DTF (Table 4).

### 357 **M × E analysis revealed markers associated with grain yield**

358 The M × E interaction analysis was conducted to assess the significance and strength of the  
359 SNP effects on yield across trials. Analyses focussed on 13 SNPs that were associated with  
360 canopy development and segregating in population subsets evaluated across all trials.

361 The allelic effects on canopy development were first explored using data collected from  
362 2020\_WW. For all SNPs, the allele associated with either higher NDVI or larger AUC was  
363 defined as the positive allele, which was linked to rapid canopy closure (Table 4). To account  
364 for the fact that SNP 2256343 was also associated with flowering time (Fig. S3, Table 4), we  
365 excluded the top 20% and bottom 20% of genotypes in 2019\_TS and 2020\_WW based on DTF.  
366 As a result, 131 and 185 genotypes that showed no significant difference in DTF were retained  
367 in 2019\_TS and 2020\_WW, respectively, and were used for the analysis of yield effects  
368 associated with SNP 2256343.

369 A linear mixed model approach was employed to evaluate effects for each of the 13 SNPs using  
370 yield data from four rainfed trials (Table 1). In the current study, no significant marker main  
371 effect was detected for yield. Instead, 9 markers showed significant M × E interactions for yield  
372 (Table 5). Notably, SNP 1095539, 3949783, 4404447 and 5324123 showed significant yield  
373 effects in 2017\_WW, 2017\_WW, 2017\_RW, and 2020\_WW, respectively (Table 5). Alleles  
374 associated with a significant yield benefit were associated with slow canopy closure (Fig. S5;  
375 Table 4, 5). Therefore, these four SNPs of interest were subjected to further investigation.



376 **Alleles influencing canopy development and yield were also associated with spike length**  
377 **and spike number**

378 Three of the four marker alleles associated with a slower closing canopy and yield (1095539,  
379 3949783, 4404447 and 5324123) also showed associations with SL or SN. Interestingly, SNP  
380 5324123 was strongly associated with both SL and SN in 2020\_WW, but the yield benefit in  
381 this trial was related to a reduction in SN (Fig. S6D, Table 5-6). Similarly, the significant yield  
382 effect of SNP 1095539 in 2017\_WW was associated with SL (Fig. S6D, Tables 5-6). On the  
383 other hand, SNP 3949783 was associated with SL in 2020\_WW but not yield (Tables 5-6).  
384 SNP 4404447 was not associated with either component traits (Table 6). Notably, SNP  
385 4404447 was not associated with yield in 2017\_WW and 2020\_WW and these were the  
386 environments where data for SL and SN were captured (Table 5). Overall, alleles associated  
387 with slow canopy closure supported yield, however, the contribution and yield benefit  
388 associated with pleiotropic effects on SL and SN appeared highly context dependent across the  
389 environments.

390 **Discussion**

391 Wheat yield is determined by the interaction between source, which is the availability of  
392 photoassimilates, and sink, which is the number of grains per unit area (Reynolds *et al.*, 2017).  
393 Canopy development underpins yield potential, as it influences the capture of light, water use,  
394 transpiration, and overall biomass production. In water-limited environments, optimal canopy  
395 development balances water use both pre- and post-anthesis to maximise yield. For example,  
396 while slow canopy development may not favour biomass accumulation pre-anthesis, it can help  
397 to conserve soil moisture for the critical grain filling period. However, in environments where  
398 water is non-limiting, optimal canopy development should maximise biomass production and  
399 overall sink strength as there is no penalty of high water-use early in the season. This study  
400 revealed a high degree of variation for temporal canopy dynamics in elite durum wheat  
401 populations derived from Australian × ICARDA crosses, which could be used to improve  
402 durum wheat adaptation to a range of target environments. New knowledge of the underlying  
403 genetics and value of canopy developmental traits described in this study provide important  
404 steps towards the development of new cultivars with improved resource-use efficiency to  
405 maximise crop yield.

406 **Using NDVI to measure canopy development**



407 NDVI serves as an easy-to-measure indicator of canopy development in real time. The link  
408 between NDVI and canopy development is strongly underpinned by the functional relationship  
409 between NDVI and aboveground biomass. In accordance with previous research, time-specific  
410 NDVI measures during the early growing period were generally poor predictors of yield  
411 (Magney *et al.*, 2016), whereas NDVI captured at the peak of canopy development is more  
412 associated with yield. This is somewhat expected due to the complexity underpinning yield  
413 development. Furthermore, the stem elongation to flowering phase is considered the most  
414 critical for determining grain number and ultimately sink strength.

415 Phenological and environmental changes over time affect the canopy status represented by  
416 NDVI. Therefore, the use of the NDVI integral (i.e., area under the curve) provides an  
417 advantage over time specific NDVI as it captures the impact of those changes on canopy  
418 development. To accurately assess long-term patterns of canopy development, regular NDVI  
419 measurements are required. Nonlinear models have been widely used to account for the  
420 complexities of plant growth (Paine *et al.*, 2012; Villegas *et al.*, 2001). Previous studies  
421 comparing different models to characterise the dynamics of NDVI over time found that spline-  
422 fitting better approximated the variation of smoothed NDVI values than other non-linear  
423 functions and was more suitable for describing the time-series model (Sun *et al.*, 2017;  
424 Vorobiova and Chernov, 2017). In this study, the trajectories of smoothed NDVI data showed  
425 a typical temporal pattern of NDVI evolution during the vegetative stage, where crop  
426 emergence was followed by a rapid growth period, then a relatively stable period of maximum  
427 vegetation approaching anthesis. Therefore, cumulative NDVI at specific growth stages could  
428 be used to gain insights of the physiological drivers underpinning grain yield.

## 429 **The genetics of canopy development**

430 To identify loci underpinning canopy development, time-point NDVI data were treated as  
431 independent traits and association mapping was performed for each timepoint to identify time-  
432 specific NDVI (Fig. 2). Next, spline-fitted curve-derived AUC was subject to mapping, and  
433 results were compared to mapping of time-point NDVI.

434 Time-point NDVI measures were highly correlated, suggesting the underlying genetic controls  
435 either provide long-term regulation of canopy growth or have prolonged effects originating  
436 from an early growth phase. This was further confirmed in the mapping results, where the 2A  
437 QTL (SNP 1271404) was detected by multiple time-point NDVI.

438 AUC in the current study was used to capture the genetic basis of canopy growth with respect  
439 to key developmental stages. However, some QTL could only be detected using time-point  
440 NDVI and it is unclear why these QTL could not be captured using the AUC approach. One  
441 possible explanation is that they were transient QTL sensitive to time of data collection,  
442 whereas AUC represented a period of growth, and therefore more likely detected loci with  
443 more consistent and robust effects. Thus, time-point NDVI and AUC had different mapping  
444 strengths and were complementary to each other. The use of AUC for mapping time-dependent  
445 canopy development should be implemented on a case-by-case basis, with the aim of ensuring  
446 good quality data for use in modelling canopy dynamics. Additionally, AUC values should not  
447 be directly compared across different studies, as AUC is a product of many contributing factors,  
448 including the environment, modelling approach, phenotyping method and crop phenology.

449 This study uncovered four SNPs on chromosomes 2B (1095539 and 3949783), 4A (5324123)  
450 and 6A (4404447) that could be useful for durum wheat breeding, as alleles associated with  
451 slow canopy closure were linked to a yield advantage in some environments, but not a yield  
452 penalty in other environments. Notably, all four SNPs were not associated with DTF, which  
453 improves the utility of the genes from a breeding perspective, as canopy development could be  
454 manipulated without shifting flowering time. Three of the four SNPs (1095539, 3949783 and  
455 5324123) were also associated with yield component traits: SN and SL, where SL is considered  
456 a proxy for the number of grains per spike (Baye *et al.*, 2020). Interestingly, most of these SNPs  
457 were detected using NDVI measures recorded at the early tillering stage, an important phase  
458 for spike formation in wheat (Khadka *et al.*, 2020), when no correlation between NDVI and  
459 yield was found. The 2B (3949783) and 6A (4404447) regions have previously been reported  
460 to influence a range of spike traits including spike dry matter, grain weight per spike, grains  
461 per spike and grain weight (Giunta *et al.*, 2018; Mangini *et al.*, 2018; Patil *et al.*, 2013; Peleg  
462 *et al.*, 2009; Soriano *et al.*, 2017). While the 4A region (5324123) has not previously been  
463 reported for SN and SL per se, it has been reported to influence similar or related traits,  
464 including biomass, harvest index, spike harvest index, spike density (spikelet number/SL), and  
465 importantly grain yield (Mengistu *et al.*, 2016; Peleg *et al.*, 2011; Peleg *et al.*, 2009; Tzarfati  
466 *et al.*, 2014).

#### 467 **Yield benefits of slow canopy development, trade-offs and pleiotropic effects**

468 Four QTL for slow canopy development were associated with yield in three of the four rainfed  
469 environments (2017\_RW, 2017\_WW and 2020\_WW). These three trials likely experienced

470 water stress at anthesis, whereas 2019\_TS received very little in-crop rainfall (Fig. S4C) and  
471 likely experienced pre-anthesis water stress. This highlights the value of slow canopy  
472 development in water-limited environments that experience drought at anthesis or during the  
473 grain filling period. As discussed above, the benefit of a slow closing canopy likely manifests  
474 from water savings that support yield formation during grain filling. Without having sufficient  
475 environmental data to perform robust envirotyping in APSIM (Chenu *et al.*, 2013), it is difficult  
476 to quantify the degree of water-stress in the rainfed experiments. However, soil moisture was  
477 measured in the dryland and irrigated strips adjacent to the 2020\_WW trial. Soil moisture under  
478 the rainfed conditions was clearly depleted at anthesis, particularly in deeper soil layers (Fig.  
479 S7A), and the water limitation resulted in an average yield loss of 1.1 tonnes ha<sup>-1</sup>. This  
480 highlights the impact of drought under rainfed conditions in Australia, despite three of the four  
481 trials being conducted on deep soils with a high water-holding capacity. Although soil moisture  
482 data was not available for 2017\_WW, the same site was used for 2020\_WW. In 2017\_WW the  
483 trial received less in-crop rainfall compared to 2020\_WW (Table 1), suggesting it likely  
484 experienced similar or more severe water stress than 2020\_WW. Terminal drought often occurs  
485 in Mediterranean-type environments, such as South Australia. In 2017\_RW, about 90% of the  
486 in-crop rainfall occurred from May to September, suggesting the trial experienced water stress  
487 late in the season (Fig. S4A). Regardless of the delayed onset of water stress (compared with  
488 the Warwick sites in Queensland), the four QTL associated with slow canopy development  
489 contributed positive yield effects.

490 Harvested wheat yield is a result of three components: spike number per unit area, grain number  
491 per spike, and average grain weight (Simmonds *et al.*, 2014; Zhang *et al.*, 2018). In the current  
492 study, the relationship between SL, SN and yield varied across the two trials (2017\_WW and  
493 2020\_WW). Specifically, SL showed a significant correlation with yield in 2017\_WW, but not  
494 in 2020\_WW (Fig. S6A, C), while SN showed a significant correlation with yield in 2020\_WW,  
495 but not in 2017\_WW (Fig. S6B, D). Previous studies in both bread and durum wheat have  
496 reported positive relationships between SL and yield under water-limited conditions (Munir *et*  
497 *al.*, 2007; Nofouzi, 2018). In this scenario, genotypes with fewer tillers could accumulate less  
498 biomass, but produce longer spikes with more grains, to achieve a yield advantage.

499 It is plausible that loci associated with canopy development and yield component traits could  
500 be involved in modulating root architecture. The study by Voss-Fels *et al.* (2018) reported that  
501 allelic variation at *Vrn1*, a key gene in the wheat flowering pathway, not only influences spike

502 and canopy development, but also root system architecture. In the current study, a QTL on 2B  
503 (1095539) associated with AUC\_SS and AUC\_SE was positioned in close proximity with  
504 previously reported QTL for root growth angle and primary root length (Maccaferri *et al.*,  
505 2016). Thus, either closely positioned or pleiotropic loci on chromosome 2B could be important  
506 for both above- and below-ground developmental traits.

507 Clearly, the value of different yield component traits in durum wheat is highly context  
508 dependent, and genotypes can exploit a range of pathways to maximise yield in each  
509 environment. A priority for future research is to understand the complex interactions and  
510 possible pleiotropic effects of loci influencing both canopy development and yield component  
511 traits. Such insight will enable selection and deployment of desirable gene combinations in  
512 breeding programs seeking to develop new varieties with improved resilience and productivity.

### 513 **Acknowledgements**

514 Funding was supported by Grain Research and Development Corporation (GRDC; project code  
515 UOQ1903-007RTX).

### 516 **Author Contribution**

517 YCK, LTH and SA conceived and designed the study. SUK and SA contributed to developing  
518 the plant materials. YCK, SA, JA and LTH performed the phenotyping. SV processed RGB  
519 images using Canopeo. YCK analysed the data. YCK and SVH prepared the figures. DBK and  
520 KPV advised on the data analysis. KC and JC advised on interpretation of trait relationships.  
521 YCK wrote the manuscript. AKB contributed to physiological understanding of the data, DBK,  
522 AKB, MRS and LTH edited the manuscript. All authors read and reviewed the manuscript.

### 523 **Data Availability Statement**

524 All data supporting the findings of this study are available within the paper and within its  
525 supplementary materials published online.

### 526 **References**

527 Alahmad S, El Hassouni K, Bassi FM, Dinglasan E, Youssef C, Quarry G, Aksoy A,  
528 Mazzucotelli E, Juhasz A, Able JA, Christopher J, Voss-Fels KP, Hickey LT. 2019. A major  
529 root architecture QTL responding to water limitation in durum wheat. *Frontiers in Plant*  
530 *Science* 10.

- 531 Bassi FM, Nachit MM. 2019. Genetic gain for yield and allelic diversity over 35 years of durum  
532 wheat breeding at ICARDA. *Crop Breed. Genet. Genom* 1, 1-19.
- 533 Baye A, Berihun B, Bantayehu M, Derebe B. 2020. Genotypic and phenotypic correlation and  
534 path coefficient analysis for yield and yield-related traits in advanced bread wheat (*Triticum*  
535 *aestivum* L.) lines. *Cogent Food & Agriculture* 6.
- 536 Benjamini Y, Hochberg Y. 1995. Controlling the False Discovery Rate: A Practical and  
537 Powerful Approach to Multiple Testing. *Journal of the Royal Statistical Society Series B-*  
538 *Statistical Methodology* 57, 289-300.
- 539 Borrell AK, Mullet JE, George-Jaeggli B, van Oosterom EJ, Hammer GL, Klein PE, Jordan  
540 DR. 2014. Drought adaptation of stay-green sorghum is associated with canopy development,  
541 leaf anatomy, root growth, and water uptake. *Journal of Experimental Botany* 65, 6251-6263.
- 542 Brown ME, de Beurs KM. 2008. Evaluation of multi-sensor semi-arid crop season parameters  
543 based on NDVI and rainfall. *Remote Sensing of Environment* 112, 2261-2271.
- 544 Bustos-Korts D, Boer MP, Malosetti M, Chapman S, Chenu K, Zheng BY, van Eeuwijk F.  
545 2019. Combining Crop Growth Modeling and Statistical Genetic Modeling to Evaluate  
546 Phenotyping Strategies. *Frontiers in Plant Science* 10.
- 547 Butler DG, Cullis BR, Gilmour AR, Gogel BJ. 2009. ASReml-R reference manual. The State  
548 of Queensland, Department of Primary Industries and Fisheries, Brisbane.
- 549 Cabrera-Bosquet L, Molero G, Stellacci AM, Bort J, Nogues S, Araus JL. 2011. NDVI as a  
550 potential tool for predicting biomass, plant nitrogen content and growth in wheat genotypes  
551 subjected to different water and nitrogen conditions. *Cereal Research Communications* 39,  
552 147-159.
- 553 Carlson TN, Ripley DA. 1997. On the relation between NDVI, fractional vegetation cover, and  
554 leaf area index. *Remote Sensing of Environment* 62, 241-252.
- 555 Chenu K, Deihimfard R, Chapman SC. 2013. Large-scale characterization of drought pattern:  
556 a continent-wide modelling approach applied to the Australian wheatbelt spatial and temporal  
557 trends. *New Phytologist* 198, 801-820.
- 558 Christopher JT, Christopher MJ, Borrell AK, Fletcher S, Chenu K. 2016. Stay-green traits to  
559 improve wheat adaptation in well-watered and water-limited environments. *Journal of*  
560 *Experimental Botany* 67, 5159-5172.
- 561 Christopher JT, Veyradier M, Borrell AK, Harvey G, Fletcher S, Chenu K. 2014. Phenotyping  
562 novel stay-green traits to capture genetic variation in senescence dynamics. *Functional Plant*  
563 *Biology* 41, 1035-1048.
- 564 Collins B, Chapman S, Hammer G, Chenu K. 2021. Limiting transpiration rate in high  
565 evaporative demand conditions to improve Australian wheat productivity. *in silico Plants* 3,  
566 diab006.
- 567 Condorelli GE, Maccaferri M, Newcomb M, Andrade-Sanchez P, White JW, French AN,  
568 Sciara G, Ward R, Tuberosa R. 2018. Comparative aerial and ground based high throughput  
569 phenotyping for the genetic dissection of NDVI as a proxy for drought adaptive traits in durum  
570 wheat. *Frontiers in Plant Science* 9.
- 571 Cullis BR, Smith AB, Coombes NE. 2006. On the design of early generation variety trials with  
572 correlated data. *Journal of Agricultural Biological and Environmental Statistics* 11, 381-393.
- 573 De Vita P, Nicosia OL, Nigro F, Platani C, Riefolo C, Di Fonzo N, Cattivelli L. 2007. Breeding  
574 progress in morpho-physiological, agronomical and qualitative traits of durum wheat cultivars  
575 released in Italy during the 20th century. *European Journal of Agronomy* 26, 39-53.
- 576 Gamon JA, Field CB, Goulden ML, Griffin KL, Hartley AE, Joel G, Peñuelas J, Valentini R.  
577 1995. Relationships between NDVI, canopy structure, and photosynthesis in three Californian  
578 vegetation types. *Ecological Applications* 5, 28-41.



- 579 George-Jaeggli B, Mortlock MY, Borrell AK. 2017. Bigger is not always better: Reducing leaf  
580 area helps stay-green sorghum use soil water more slowly. *Environmental and Experimental*  
581 *Botany* 138, 119-129.
- 582 Gevrek MN, Atasoy GD. 2012. Effect of post anthesis drought on certain agronomical  
583 characteristics of wheat under two different nitrogen application conditions. *Turkish Journal of*  
584 *Field Crops* 17, 19-23.
- 585 Giunta F, De Vita P, Mastrangelo AM, Sanna G, Motzo R. 2018. Environmental and Genetic  
586 Variation for Yield-Related Traits of Durum Wheat as Affected by Development. *Frontiers in*  
587 *Plant Science* 9.
- 588 Goodwin AW, Lindsey LE, Harrison SK, Paul PA. 2018. Estimating Wheat Yield with  
589 Normalized Difference Vegetation Index and Fractional Green Canopy Cover. *Crop Forage &*  
590 *Turfgrass Management* 4.
- 591 Hammer GL, McLean G, van Oosterom E, Chapman S, Zheng BY, Wu A, Doherty A, Jordan  
592 D. 2020. Designing crops for adaptation to the drought and high-temperature risks anticipated  
593 in future climates. *Crop Science* 60, 605-621.
- 594 Jeffrey SJ, Carter JO, Moodie KB, Beswick AR. 2001. Using spatial interpolation to construct  
595 a comprehensive archive of Australian climate data. *Environmental Modelling & Software* 16,  
596 309-330.
- 597 Khadka K, Earl HJ, Raizada MN, Navabi A. 2020. A Physio-Morphological Trait-Based  
598 Approach for Breeding Drought Tolerant Wheat. *Frontiers in Plant Science* 11.
- 599 Kwak IY, Moore CR, Spalding EP, Broman KW. 2016. Mapping quantitative trait loci  
600 underlying function-valued traits using functional principal component analysis and multi-trait  
601 mapping. *G3-Genes Genomes Genetics* 6, 79-86.
- 602 Liu XL, Huang M, Fan B, Buckler ES, Zhang ZW. 2016. Iterative Usage of Fixed and Random  
603 Effect Models for Powerful and Efficient Genome-Wide Association Studies. *Plos Genetics* 12.
- 604 Lopes MS, Reynolds MP. 2012. Stay-green in spring wheat can be determined by spectral  
605 reflectance measurements (normalized difference vegetation index) independently from  
606 phenology. *Journal of Experimental Botany* 63, 3789-3798.
- 607 Lopez-Castaneda C, Richards RA, Farquhar GD. 1995. Variation in early vigor between wheat  
608 and barley. *Crop Science* 35, 472-479.
- 609 Loss SP, Siddique KHM. 1994. Morphological and physiological traits associated with wheat  
610 yield increases in Mediterranean environments. *Advances in Agronomy*, Vol 52 52, 229-276.
- 611 Lyra DH, Virlet N, Sadeghi-Tehran P, Hassall KL, Wingen LU, Orford S, Griffiths S,  
612 Hawkesford MJ, Slavov GT. 2020. Functional QTL mapping and genomic prediction of  
613 canopy height in wheat measured using a robotic field phenotyping platform. *Journal of*  
614 *Experimental Botany* 71, 1885-1898.
- 615 Maccaferri M, El-Feki W, Nazemi G, Salvi S, Cane MA, Colalongo MC, Stefanelli S, Tuberosa  
616 R. 2016. Prioritizing quantitative trait loci for root system architecture in tetraploid wheat.  
617 *Journal of Experimental Botany* 67, 1161-1178.
- 618 Maccaferri M, Sanguineti MC, Corneti S, Ortega JLA, Ben Salem M, Bort J, DeAmbrogio E,  
619 del Moral LFG, Demontis A, El-Ahmed A, Maalouf F, Machlab H, Martos V, Moragues M,  
620 Motawaj J, Nachit M, Nserallah N, Ouabbou H, Royo C, Slama A, Tuberosa R. 2008.  
621 Quantitative trait loci for grain yield and adaptation of durum wheat (*Triticum durum* Desf.)  
622 across a wide range of water availability. *Genetics* 178, 489-511.
- 623 Magney TS, Eitel JUH, Huggins DR, Vierling LA. 2016. Proximal NDVI derived phenology  
624 improves in-season predictions of wheat quantity and quality. *Agricultural and Forest*  
625 *Meteorology* 217, 46-60.
- 626 Malosetti M, Ribaut JM, van Eeuwijk FA. 2013. The statistical analysis of multi-environment  
627 data: modeling genotype-by-environment interaction and its genetic basis. *Frontiers in*  
628 *Physiology* 4.

- 629 Mangini G, Gadaleta A, Colasuonno P, Marcotuli I, Signorile AM, Simeone R, De Vita P,  
630 Mastrangelo AM, Laido G, Pecchioni N, Blanco A. 2018. Genetic dissection of the  
631 relationships between grain yield components by genome-wide association mapping in a  
632 collection of tetraploid wheats. *Plos One* 13.
- 633 Masiale I, Egbert S, Wardlow BD. 2010. A Comparative Analysis of Phenological Curves for  
634 Major Crops in Kansas. *Giscience & Remote Sensing* 47, 241-259.
- 635 Matesanz S, Ramos-Munoz M, Moncalvillo B, Teso MLR, de Dionisio SLG, Romero J,  
636 Iriando JM. 2020. Plasticity to drought and ecotypic differentiation in populations of a crop  
637 wild relative. *Aob Plants* 12.
- 638 Mengistu DK, Kidane YG, Catellani M, Frascaroli E, Fadda C, Pe ME, Dell'Acqua M. 2016.  
639 High-density molecular characterization and association mapping in Ethiopian durum wheat  
640 landraces reveals high diversity and potential for wheat breeding. *Plant Biotechnology Journal*  
641 14, 1800-1812.
- 642 Miao C, Xu Y, Liu S, Schnable PS, Schnable JC. 2020. Increased power and accuracy of causal  
643 locus identification in time series genome-wide association in sorghum. *Plant Physiology* 183,  
644 1898-1909.
- 645 Miralles DJ, Rharrabti Y, Royo C, Villegas D, Garcia del Moral LF. 2002. Grain setting  
646 strategies of Mediterranean durum wheat cultivars released in different periods (1900–2000).  
647 *Genotype-Phenotype: Narrowing the Gaps. AAB Conference*, . Cirencester, UK.
- 648 Motzo R, Giunta F, Pruneddu G. 2010. The response of rate and duration of grain filling to  
649 long-term selection for yield in Italian durum wheats. *Crop & Pasture Science* 61, 162-169.
- 650 Mullan DJ, Reynolds MP. 2010. Quantifying genetic effects of ground cover on soil water  
651 evaporation using digital imaging. *Functional Plant Biology* 37, 703-712.
- 652 Munir M, Chowdhry MA, Malik TA. 2007. Correlation studies among yield and its  
653 components in bread wheat under drought conditions. *International Journal of Agriculture and*  
654 *Biology (Pakistan)*.
- 655 Muraya MM, Chu JT, Zhao YS, Junker A, Klukas C, Reif JC, Altmann T. 2017. Genetic  
656 variation of growth dynamics in maize (*Zea mays* L.) revealed through automated non-invasive  
657 phenotyping. *Plant Journal* 89, 366-380.
- 658 Nofouzi F. 2018. Evaluation of seed yield of durum wheat (*Triticum durum*) under drought  
659 stress and determining correlation among some yield components using path coefficient  
660 analysis. *Cuadernos de Investigación UNED* 10, 179-183.
- 661 Nuttall JG, O'Leary GJ, Khimashia N, Asseng S, Fitzgerald G, Norton R. 2012. 'Haying-off' in  
662 wheat is predicted to increase under a future climate in south-eastern Australia. *Crop & Pasture*  
663 *Science* 63, 593-605.
- 664 Paine CET, Marthews TR, Vogt DR, Purves D, Rees M, Hector A, Turnbull LA. 2012. How  
665 to fit nonlinear plant growth models and calculate growth rates: an update for ecologists.  
666 *Methods in Ecology and Evolution* 3, 245-256.
- 667 Patil RM, Tamhankar SA, Oak MD, Raut AL, Honrao BK, Rao VS, Misra SC. 2013. Mapping  
668 of QTL for agronomic traits and kernel characters in durum wheat (*Triticum durum* Desf.).  
669 *Euphytica* 190, 117-129.
- 670 Patrignani A, Ochsner TE. 2015. Canopeo: A Powerful New Tool for Measuring Fractional  
671 Green Canopy Cover. *Agronomy Journal* 107, 2312-2320.
- 672 Peleg Z, Fahima T, Korol AB, Abbo S, Saranga Y. 2011. Genetic analysis of wheat  
673 domestication and evolution under domestication. *Journal of Experimental Botany* 62, 5051-  
674 5061.
- 675 Peleg Z, Fahima T, Krugman T, Abbo S, Yakir D, Korol AB, Saranga Y. 2009. Genomic  
676 dissection of drought resistance in durum wheat x wild emmer wheat recombinant inbreed line  
677 population. *Plant Cell and Environment* 32, 758-779.



- 678 Pinto RS, Lopes MS, Collins NC, Reynolds MP. 2016. Modelling and genetic dissection of  
679 staygreen under heat stress. *Theoretical and Applied Genetics* 129, 2055-2074.
- 680 Regan KL, Siddique KHM, Tennant D, Abrecht DG. 1997. Grain yield and water use efficiency  
681 of early maturing wheat in low rainfall Mediterranean environments. *Australian Journal of*  
682 *Agricultural Research* 48, 595-603.
- 683 Reynolds MP, Pask AJD, Hoppitt WJE, Sonder K, Sukumaran S, Molero G, Saint Pierre C,  
684 Payne T, Singh RP, Braun HJ, Gonzalez FG, Terrile, II, Barma NCD, Hakim A, He ZH, Fan  
685 ZR, Novoselovic D, Maghraby M, Gad KIM, Galal EG, Hagraas A, Mohamed MM, Morad  
686 AFA, Kumar U, Singh GP, Naik R, Kalappanavar IK, Biradar S, Prasad SVS, Chatrath R,  
687 Sharma I, Panchabhai K, Sohu VS, Mavi GS, Mishra VK, Balasubramaniam A, Jalal-Kamali  
688 MR, Khodarahmi M, Dastfal M, Tabib-Ghaffari SM, Jafarby J, Nikzad AR, Moghaddam HA,  
689 Ghoghogh H, Mehraban A, Solis-Moya E, Camacho-Casas MA, Figueroa-Lopez P, Ireta-  
690 Moreno J, Alvarado-Padilla JI, Borbon-Gracia A, Torres A, Quiche YN, Upadhyay SR, Pandey  
691 D, Imtiaz M, Rehman MU, Hussain M, Ud-Din R, Qamar M, Kundi M, Mujahid MY, Ahmad  
692 G, Khan AJ, Sial MA, Mustatea P, von Well E, Ncala M, de Groot S, Hussein AHA, Tahir ISA,  
693 Idris AAM, Elamein HMM, Manes Y, Joshi AK. 2017. Strategic crossing of biomass and  
694 harvest index-source and sink-achieves genetic gains in wheat. *Euphytica* 213.
- 695 Rodrigues J, Inze D, Nelissen H, Saibo NJM. 2019. Source-sink regulation in crops under water  
696 deficit. *Trends in Plant Science* 24, 652-663.
- 697 Royo C, Abaza M, Blanco R, del Moral LFG. 2000. Triticale grain growth and morphometry  
698 as affected by drought stress, late sowing and simulated drought stress. *Australian Journal of*  
699 *Plant Physiology* 27, 1051-1059.
- 700 Sall AT, Chiari T, Legesse W, Seid-Ahmed K, Ortiz R, van Ginkel M, Bassi FM. 2019. Durum  
701 wheat (*Triticum durum* Desf.): origin, cultivation and potential expansion in Sub-Saharan  
702 Africa. *Agronomy-Basel* 9.
- 703 Shavrukov Y, Kurishbayev A, Jatayev S, Shvidchenko V, Zotova L, Koekemoer F, de Groot  
704 S, Soole K, Langridge P. 2017. Early flowering as a drought escape mechanism in plants: How  
705 can it aid wheat production? *Frontiers in Plant Science* 8, 1950.
- 706 Shi SK, Azam FI, Li HH, Chang XP, Li BY, Jing RL. 2017. Mapping QTL for stay-green and  
707 agronomic traits in wheat under diverse water regimes. *Euphytica* 213.
- 708 Simmonds J, Scott P, Leverington-Waite M, Turner AS, Brinton J, Korzun V, Snape J, Uauy  
709 C. 2014. Identification and independent validation of a stable yield and thousand grain weight  
710 QTL on chromosome 6A of hexaploid wheat (*Triticum aestivum* L.). *Bmc Plant Biology* 14.
- 711 Smith RCG, Adams J, Stephens DJ, Hick PT. 1995. Forecasting wheat yield in a  
712 Mediterranean-type environment from the NOAA satellite. *Australian Journal of Agricultural*  
713 *Research* 46, 113-125.
- 714 Soltani A, Galeshi S. 2002. Importance of rapid canopy closure for wheat production in a  
715 temperate sub-humid environment: experimentation and simulation. *Field Crops Research* 77,  
716 17-30.
- 717 Soriano JM, Malosetti M, Rosello M, Sorrells ME, Royo C. 2017. Dissecting the old  
718 Mediterranean durum wheat genetic architecture for phenology, biomass and yield formation  
719 by association mapping and QTL meta-analysis. *Plos One* 12.
- 720 Sun J, Rutkoski JE, Poland JA, Crossa J, Jannink JL, Sorrells ME. 2017. Multitrait, Random  
721 Regression, or Simple Repeatability Model in High-Throughput Phenotyping Data Improve  
722 Genomic Prediction for Wheat Grain Yield. *Plant Genome* 10.
- 723 Teal RK, Tubana B, Girma K, Freeman KW, Arnall DB, Walsh O, Raun WR. 2006. In-season  
724 prediction of corn grain yield potential using normalized difference vegetation index.  
725 *Agronomy Journal* 98, 1488-1494.

- 726 Tzarfati R, Barak V, Krugman T, Fahima T, Abbo S, Saranga Y, Korol AB. 2014. Novel  
727 quantitative trait loci underlying major domestication traits in tetraploid wheat. *Molecular*  
728 *Breeding* 34, 1613-1628.
- 729 Verbyla AP, Cullis BR, Kenward MG, Welham SJ. 1999. The analysis of designed experiments  
730 and longitudinal data by using smoothing splines. *Journal of the Royal Statistical Society Series*  
731 *C-Applied Statistics* 48, 269-300.
- 732 Villegas D, Aparicio N, Blanco R, Royo C. 2001. Biomass accumulation and main stem  
733 elongation of durum wheat grown under Mediterranean conditions. *Annals of Botany* 88, 617-  
734 627.
- 735 Vorobiova N, Chernov A. 2017. Curve fitting of MODIS NDVI time series in the task of early  
736 crops identification by satellite images. 3rd International Conference Information Technology  
737 and Nanotechnology (Intnt-2017) 201, 184-195.
- 738 Voss-Fels KP, Robinson H, Mudge SR, Richard C, Newman S, Wittkop B, Stahl A, Friedt W,  
739 Frisch M, Gabur I, Miller-Cooper A, Campbell BC, Kelly A, Fox G, Christopher J, Christopher  
740 M, Chenu K, Franckowiak J, Mace ES, Borrell AK, Eagles H, Jordan DR, Botella JR, Hammer  
741 G, Godwin ID, Trevaskis B, Snowdon RJ, Hickey LT. 2018. VERNALIZATION1 Modulates  
742 Root System Architecture in Wheat and Barley. *Molecular Plant* 11, 226-229.
- 743 Xue JR, Su BF. 2017. Significant remote sensing vegetation indices: a review of developments  
744 and applications. *Journal of Sensors* 2017.
- 745 Zadoks JC, Chang TT, Konzak CF. 1974. A decimal code for the growth stages of cereals.  
746 *Weed research* 14, 415-421.
- 747 Zhang JL, Gizaw SA, Bossolini E, Hegarty J, Howell T, Carter AH, Akhunov E, Dubcovsky J.  
748 2018. Identification and validation of QTL for grain yield and plant water status under  
749 contrasting water treatments in fall-sown spring wheats. *Theoretical and Applied Genetics* 131,  
750 1741-1759.
- 751

**Table 1.** Attributes of the four rainfed yield trials conducted between 2017 and 2020.

| <b>Trial</b>                           | <b>2017_RW</b>  | <b>2017_WW</b>                                 | <b>2019_TS</b> | <b>2020_WW</b>                                                                  |
|----------------------------------------|-----------------|------------------------------------------------|----------------|---------------------------------------------------------------------------------|
| Location                               | Roseworthy      | Warwick                                        | Tosari         | Warwick                                                                         |
| SD <sup>1</sup>                        | 09/05/2017      | 22/06/2017                                     | 08/07/2019     | 01/07/2020                                                                      |
| HarvD <sup>2</sup>                     | 22/11/2017      | 15/11/2017                                     | 15/11/2019     | 26/11/2020                                                                      |
| No. of plots <sup>3</sup>              | 576             | 336                                            | 440            | 456                                                                             |
| ICR (mm) <sup>4</sup>                  | 320.7           | 137.5                                          | 12.8           | 185.0                                                                           |
| GDD (°C) <sup>5</sup>                  | 2468            | 2190                                           | 2222           | 2377                                                                            |
| Range of DTF <sup>6</sup>              | na <sup>7</sup> | 96-108                                         | 84-102         | 90-104                                                                          |
| Yld (t-ha <sup>-1</sup> ) <sup>8</sup> | 3.95            | 4.91                                           | 2.24           | 3.87                                                                            |
| No. of geno <sup>9</sup>               | 149             | 147                                            | 217            | 309                                                                             |
| Traits measured                        | Yld             | SL <sup>10</sup> , SN <sup>11</sup> , DTF, Yld | DTF, Yld       | Canopy related traits <sup>12</sup> ,<br>SL, SN, DTF, PH <sup>13</sup> ,<br>Yld |

<sup>1</sup> Sowing date.

<sup>2</sup> Harvesting date.

<sup>3</sup> Total number of plots in the experiment.

<sup>4</sup> In-crop rainfall.

<sup>5</sup> Growing degree days during growing period.

<sup>6</sup> Range of flowering time of durum NAM population grown in the experiment, expressed as days to flowering.

<sup>7</sup> Data is not available.

<sup>8</sup> Mean yield of all genotypic BLUEs.

<sup>9</sup> Number of durum NAM lines and parents.

<sup>10</sup> Spike length measured in cm.

<sup>11</sup> Spike number per unit area.

<sup>12</sup> Canopy related traits include NDVI, and fractional green canopy cover at multiple time points at population level, and tiller number measured on 11 selected genotypes.

<sup>13</sup> Plant height measured in cm.

**Table 2.** Description of durum wheat genotypes in the 2020 field trial, including the 10 NAM parents and subset of 299 NAM lines

| <b>NAM Parent</b> | <b>Pedigree</b>                                                            | <b>No. of rep</b>  |
|-------------------|----------------------------------------------------------------------------|--------------------|
| Fastoz2           | T.polonicumTurkeyIG45272/6/ICAMORTA0463/5/Mra1/4/Aus1/3/Scar/GdoVZ579//Bit | 2                  |
| Fastoz3           | Msb11//Aw12/Bit/3/T.dicoccoidesSYRIG117887                                 | 5                  |
| Fastoz6           | Azeghar1/6/Zna1/5/Aw11/4/Ruff//Jo/Cr/3/F9.3/7/Azeghar1//Msb11/Quarmal      | 2                  |
| Fastoz7           | CandocrossH25/Ysf1//CM829/CandocrossH25                                    | 2                  |
| Fastoz8           | Mor1F38//Bcrch1/Kund1149/3/Bicrederaa1/Miki = Kunmiki                      | 3                  |
| Fastoz10          | Younes/TdicoAlpCol//Korifla = Trouve                                       | 1                  |
| Fadda98           | Aw12/Bit = Awalbit9                                                        | 5                  |
| DBA Aurora        | Tamaroi*2/Kalka//RH920318/Kalka//Kalka*2/Tamaroi                           | 3                  |
| Jandaroi          | 110780/111587                                                              | 1                  |
| Outrob4           | Ouassel-1/4/GdoVZ 512/Cit//Ruff/Fg/3/Pin/Gre//Trob = Fadda98               | 1                  |
| <b>NAM family</b> | <b>Pedigree</b>                                                            | <b>No. of geno</b> |
| 1                 | DBA Aurora/Fastoz7                                                         | 20                 |
| 2                 | DBA Aurora/Outrob4                                                         | 74                 |
| 3                 | DBA Aurora/Fastoz8                                                         | 80                 |
| 5                 | DBA Aurora/Fastoz3                                                         | 80                 |
| 6                 | Jandaroi/Fastoz8                                                           | 16                 |
| 10                | Jandaroi/Outrob4                                                           | 29                 |

**Table 3.** Summary statistics for traits studied in the 2020 field trial, including minimum (Min), mean, maximum (Max), and coefficient of variation (CV) for trait BLUEs.

| <b>Traits</b>             | <b>Min</b> | <b>Mean</b> | <b>Max</b> | <b>CV (%)</b> |
|---------------------------|------------|-------------|------------|---------------|
| NDVI_22DAS <sup>1</sup>   | 0.22       | 0.27        | 0.33       | 6.3           |
| NDVI_29DAS                | 0.23       | 0.33        | 0.4        | 9.3           |
| NDVI_36DAS                | 0.26       | 0.45        | 0.55       | 9.6           |
| NDVI_43DAS                | 0.39       | 0.63        | 0.74       | 7.9           |
| NDVI_50DAS                | 0.67       | 0.84        | 0.88       | 3.5           |
| NDVI_63DAS                | 0.82       | 0.88        | 0.9        | 1.3           |
| NDVI_70DAS                | 0.87       | 0.89        | 0.91       | 0.6           |
| NDVI_78DAS                | 0.88       | 0.9         | 0.91       | 0.5           |
| FGCC_29DAS <sup>2</sup>   | 3.21       | 10.35       | 16.52      | 17.1          |
| FGCC_36DAS                | 7.6        | 23.34       | 33.67      | 16.9          |
| FGCC_43DAS                | 20.63      | 44.01       | 57.51      | 13.5          |
| FGCC_50DAS                | 39.81      | 70.86       | 83.91      | 9.9           |
| AUC_SS <sup>3</sup>       | 3.77       | 5.6         | 7.08       | 7.4           |
| AUC_TL <sup>4</sup>       | 14.83      | 20          | 21.8       | 5             |
| AUC_SE <sup>5</sup>       | 15.47      | 15.98       | 16.32      | 0.7           |
| AUC_VS <sup>6</sup>       | 34.99      | 41.57       | 44.46      | 3.4           |
| PH (cm)                   | 58         | 77          | 94         | 7.9           |
| DTF (days)                | 90         | 95          | 104        | 2.1           |
| SL (cm)                   | 7.19       | 9.21        | 11.35      | 8.3           |
| SN (-m <sup>2</sup> )     | 115        | 248         | 365        | 17.7          |
| Yld (t-ha <sup>-1</sup> ) | 1.66       | 3.63        | 5.56       | 17.8          |

<sup>1</sup> Normalized difference vegetation index (NDVI) measured at 22 days after sowing (DAS).

<sup>2</sup> Fractional green canopy cover (FGCC) measured at 29 DAS.

<sup>3</sup> Area under the curve of smoothed time-series NDVI (AUC) between 0-30 DAS.

<sup>4</sup> AUC between 30-60 DAS.

<sup>5</sup> AUC between 60-78 DAS.

<sup>6</sup> AUC between 0 and 78 DAS.

**Table 4.** Summary of results from association mapping of canopy development and other traits in the 2020 field trial (2020\_WW).

| Trait      | SNP     | Positive allele | Chr <sup>1</sup> | MAF <sup>2</sup> | Pos.St (bp) <sup>3</sup> | Pos.End (bp) <sup>4</sup> | -log <sub>10</sub> (p) <sup>5</sup> | -log <sub>10</sub> (p-FDR) <sup>6</sup> |
|------------|---------|-----------------|------------------|------------------|--------------------------|---------------------------|-------------------------------------|-----------------------------------------|
| NDVI_29DAS | 1271404 | 1               | 2A               | 0.21             | 745108704                | 745108769                 | 6.15                                | 2.44                                    |
|            | 3023448 | 1               | 3A               | 0.49             | 41109698                 | 41109735                  | 4.80                                | 1.78                                    |
|            | 5324123 | 1               | 4A               | 0.13             | 642498972                | 642499004                 | 4.33                                | 1.39                                    |
|            | 1202152 | 0               | 4B               | 0.49             | 565602357                | 565602424                 | 5.72                                | 2.31                                    |
|            | 4404447 | 1               | 6A               | 0.35             | 12144868                 | 12144909                  | 4.97                                | 1.85                                    |
|            | 1127685 | 0               | 6B               | 0.22             | 135162876                | 135162808                 | 5.09                                | 1.85                                    |
| NDVI_36DAS | 977411  | 1               | 4A               | 0.21             | 695150339                | 695150395                 | 5.45                                | 2.03                                    |
|            | 1130263 | 0               | 5A               | 0.06             | 417840038                | 417840097                 | 7.77                                | 4.05                                    |
| NDVI_43DAS | 1271404 | 1               | 2A               | 0.21             | 745108704                | 745108769                 | 5.97                                | 2.25                                    |
| NDVI_50DAS | 2256343 | 1               | 2A               | 0.11             | 36364366                 | 36364298                  | 5.98                                | 2.57                                    |
|            | 1271404 | 1               | 2A               | 0.21             | 745108704                | 745108769                 | 6.34                                | 2.63                                    |
|            | 3949783 | 0               | 2B               | 0.28             | 697623388                | 697623452                 | 4.71                                | 1.47                                    |
| NDVI_70DAS | 996714  | 1               | 7A               | 0.17             | 109908919                | 109908968                 | 5.71                                | 2.00                                    |
| AUC_SS     | 4004899 | 1               | 2A               | 0.35             | 735922887                | 735922955                 | 4.47                                | 1.35                                    |
|            | 1095539 | 1               | 2B               | 0.29             | 618076302                | 618076370                 | 7.17                                | 3.45                                    |
|            | 3946360 | 1               | 4A               | 0.19             | 24099524                 | 24099564                  | 5.46                                | 2.22                                    |
|            | 1093322 | 0               | 5B               | 0.20             | 528696884                | 528696822                 | 5.91                                | 2.49                                    |
| AUC_TL     | 1271404 | 1               | 2A               | 0.21             | 745108704                | 745108769                 | 5.48                                | 1.76                                    |
| AUC_SE     | 4004899 | 1               | 2A               | 0.35             | 735922887                | 735922955                 | 4.47                                | 1.35                                    |
|            | 1095539 | 0               | 2B               | 0.29             | 618076302                | 618076370                 | 7.17                                | 3.45                                    |
|            | 3946360 | 1               | 4A               | 0.19             | 24099524                 | 24099564                  | 5.46                                | 2.22                                    |
|            | 1093322 | 0               | 5B               | 0.20             | 528696884                | 528696822                 | 5.91                                | 2.49                                    |

|        |         |   |    |      |           |           |       |       |
|--------|---------|---|----|------|-----------|-----------|-------|-------|
| AUC_VS | 1271404 | 1 | 2A | 0.21 | 745108704 | 745108769 | 5.82  | 2.31  |
|        | 1108975 | 0 | 2B | 0.07 | 55930502  | 55930570  | 5.73  | 2.31  |
| DTF    | 2256343 | 0 | 2A | 0.11 | 36364298  | 36364366  | 17.50 | 13.78 |
| PH     | 4009205 | 0 | 2A | 0.27 | 982116    | 982183    | 4.73  | 1.54  |
|        | 1698984 | 1 | 2A | 0.22 | 131154183 | 131154248 | 4.50  | 1.54  |
|        | 1017668 | 1 | 2A | 0.17 | 695473023 | 695473091 | 4.50  | 1.54  |
|        | 1088708 | 1 | 4B | 0.50 | 637884852 | 637884784 | 5.30  | 1.58  |
|        | 3064427 | 1 | 5B | 0.18 | 533724323 | 533724367 | 4.80  | 1.54  |
|        | 5411254 | 0 | 7A | 0.20 | 32647340  | 32647399  | 4.48  | 1.54  |
| SL     | 1215020 | 0 | 1B | 0.47 | 640187467 | 640187527 | 4.65  | 1.78  |
|        | 4992547 | 0 | 3A | 0.22 | 618058814 | 618058882 | 5.86  | 2.75  |
|        | 1091678 | 1 | 4A | 0.46 | 636321605 | 636321665 | 8.84  | 5.13  |
|        | 3954609 | 0 | 4A | 0.12 | 190565472 | 190565511 | 4.67  | 1.78  |
|        | 1055097 | 0 | 5A | 0.09 | 639650884 | 639650944 | 6.51  | 3.27  |
|        | 982085  | 0 | 5A | 0.46 | 43161899  | 43161953  | 4.79  | 1.78  |
|        | 1092206 | 1 | 6A | 0.39 | 543489106 | 543489174 | 7.16  | 3.75  |

<sup>1</sup> Chromosome.

<sup>2</sup> Minor allele frequency.

<sup>3</sup> The start of the SNP position on the 'Svevo' durum reference genome.

<sup>4</sup> The end of the SNP position on the 'Svevo' durum reference genome.

<sup>5</sup>  $-\log_{10}$  of uncorrected  $p$  value of marker-trait association.

<sup>6</sup>  $-\log_{10}$  of FDR adjusted  $p$  value.

**Table 5.** Summary of marker  $\times$  environment interactions for yield. Predicted means of yield are presented for allele 0 and 1 at each SNP locus, and each SNP allele  $\times$  trial combination. Significant differences are indicated by different letters at 0.01 probability level following Tukey's test.

| Chromosome | 2A      | 2A      | 2B      | 2B      | 2B      | 3A      | 4A      | 6A      | 6B      |
|------------|---------|---------|---------|---------|---------|---------|---------|---------|---------|
| Allele     | 1271404 | 4004899 | 1108975 | 1095539 | 3949783 | 3023448 | 5324123 | 4404447 | 1127685 |



|           |                 |              |       |          |          |          |          |          |       |          |          |       |
|-----------|-----------------|--------------|-------|----------|----------|----------|----------|----------|-------|----------|----------|-------|
| SNP       |                 | 0            | 3.24  | 3.65     | 3.69     | 3.63     | 3.63     | 3.62     | 3.7   | 3.7      | 3.68     |       |
|           |                 | 1            | 3.77  | 3.7      | 3.66     | 3.76     | 3.77     | 3.64     | 3.58  | 3.5      | 3.66     |       |
| SNP × Env | 2017_RW         | 0            | 3.43b | 3.94c    | 4c       | 3.84bc   | 3.85cd   | 4.02c    | 3.93d | 4.03c    | 4.00c    |       |
|           |                 | 1            | 4.00b | 3.95c    | 3.55abcd | 4.07c    | 4.08d    | 3.80bc   | 3.98d | 3.61b    | 3.76bc   |       |
|           | 2017_WW         | 0            | 4.5bc | 4.95d    | 4.91d    | 4.70d    | 4.71e    | 4.81d    | 4.96e | 4.98d    | 4.88d    |       |
|           |                 | 1            | 5.11c | 4.9d     | 4.67bcd  | 5.16e    | 5.16f    | 4.86d    | 4.83e | 4.58d    | 5.05d    |       |
|           | 2019_TS         | 0            | 1.86a | 2.22a    | 2.27a    | 2.26a    | 2.26a    | 2.25a    | 2.20a | 2.26a    | 2.26a    |       |
|           |                 | 1            | 2.22a | 2.25a    | 2.45abc  | 2.22a    | 2.22a    | 2.22a    | 2.35a | 2.05a    | 2.11a    |       |
|           | 2020_WW         | 0            | 3.19b | 3.49b    | 3.57b    | 3.70b    | 3.72bc   | 3.40b    | 3.69c | 3.54b    | 3.60b    |       |
|           |                 | 1            | 3.74b | 3.69bc   | 3.98bcd  | 3.60b    | 3.59b    | 3.68bc   | 3.16b | 3.76b    | 3.74bc   |       |
|           | <i>p</i> -value | Main effect  |       | 1.36e-05 | 0.1      | 0.66     | 0.22     | 0.28     | 0.13  | 0.07     | 0.52     | 0.93  |
|           |                 | M × E effect |       | 0.02     | 0.04     | 4.39e-09 | 8.64e-06 | 8.93e-06 | 0.01  | 4.47e-06 | 1.22e-08 | 0.002 |

**Table 6.** Comparison of two homozygous alleles at four SNP loci for spike traits measured in 2017\_WW and 2020\_WW. Data was analysed with unpaired t-test in two trials separately.

| SNP     | Chr | Trial   | Allele | N <sup>1</sup> | Mean_SL <sup>2</sup> | <i>p</i> -value_SL | Mean_SN <sup>3</sup> | <i>p</i> -value_SN |
|---------|-----|---------|--------|----------------|----------------------|--------------------|----------------------|--------------------|
| 1095539 | 2B  | 2017_WW | 0      | 80             | 7.29                 | <0.05              | 323                  | 0.16               |
|         |     |         | 1      | 66             | 7.52                 |                    | 311                  |                    |
|         |     | 2020_WW | 0      | 89             | 8.98                 | <0.001             | 254                  | 0.11               |
|         |     |         | 1      | 218            | 9.3                  |                    | 245                  |                    |
| 3949783 | 2B  | 2017_WW | 0      | 80             | 7.35                 | 0.35               | 321                  | 0.40               |
|         |     |         | 1      | 66             | 7.46                 |                    | 314                  |                    |
|         |     | 2020_WW | 0      | 84             | 8.99                 | <0.001             | 248                  | 0.94               |
|         |     |         | 1      | 223            | 9.31                 |                    | 248                  |                    |
| 5324123 | 4A  | 2017_WW | 0      | 92             | 7.44                 | 0.44               | 311                  | <0.05              |
|         |     |         | 1      | 50             | 7.34                 |                    | 330                  |                    |

|         |    |         |   |     |      |        |     |       |
|---------|----|---------|---|-----|------|--------|-----|-------|
| 4404447 | 6A | 2020_WW | 0 | 256 | 9.27 | <0.001 | 245 | <0.01 |
|         |    |         | 1 | 36  | 8.82 |        | 268 |       |
|         |    | 2017_WW | 0 | 122 | 7.39 | 0.37   | 321 | 0.12  |
|         |    |         | 1 | 25  | 7.46 |        | 304 |       |
|         |    | 2020_WW | 0 | 200 | 9.18 | 0.28   | 250 | 0.27  |
|         |    |         | 1 | 109 | 9.28 |        | 244 |       |

<sup>1</sup> Number of individuals carrying allele 0 or 1 of a given SNP within the trial.

<sup>2</sup> Mean spike length (cm).

<sup>3</sup> Mean spike number per m<sup>2</sup>.

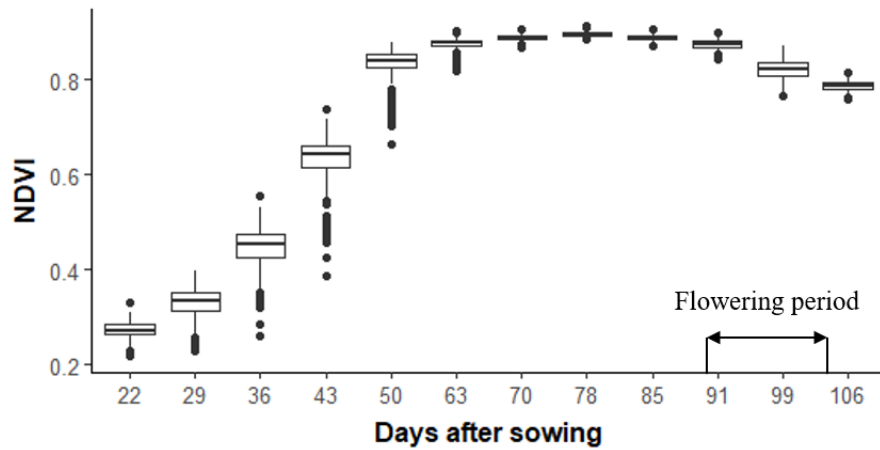

**Fig. 1.** Variability of normalized difference vegetation index (NDVI) of the durum nested-association mapping population in 2020\_WW. Each boxplot represents the range of best linear unbiased estimates (BLUEs) for NDVI at each time-point.

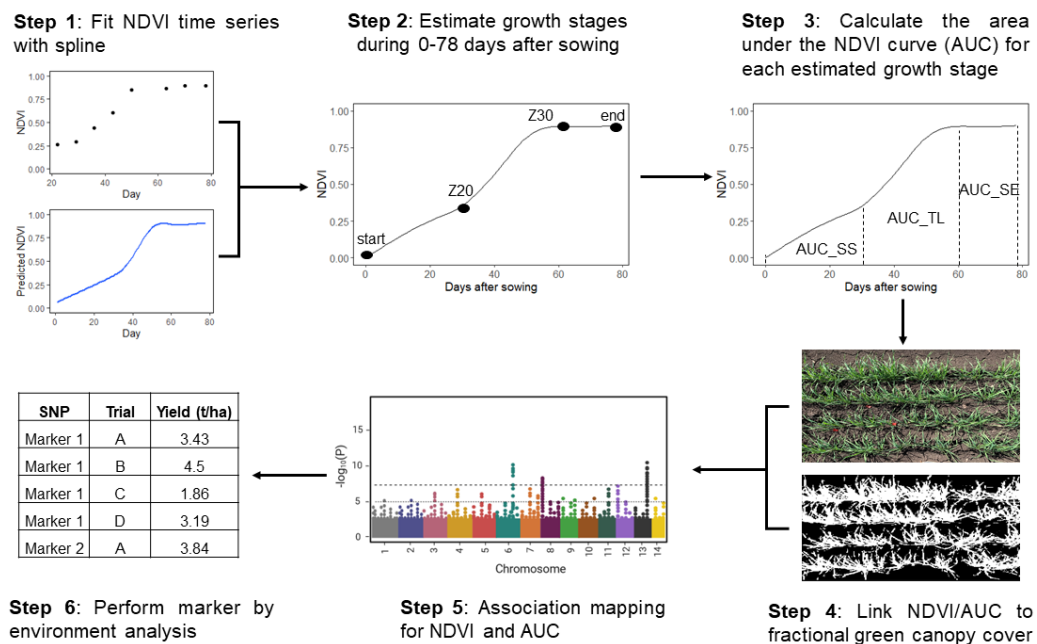

**Fig. 2.** Experimental analyses performed in this study involved the fitting of NDVI time series with a spline (1), estimation of growth stages (2), calculation of AUC for NDVI (3), link of NDVI/AUC to fractional green canopy cover (4), association mapping (5) and marker by environment analysis (6).

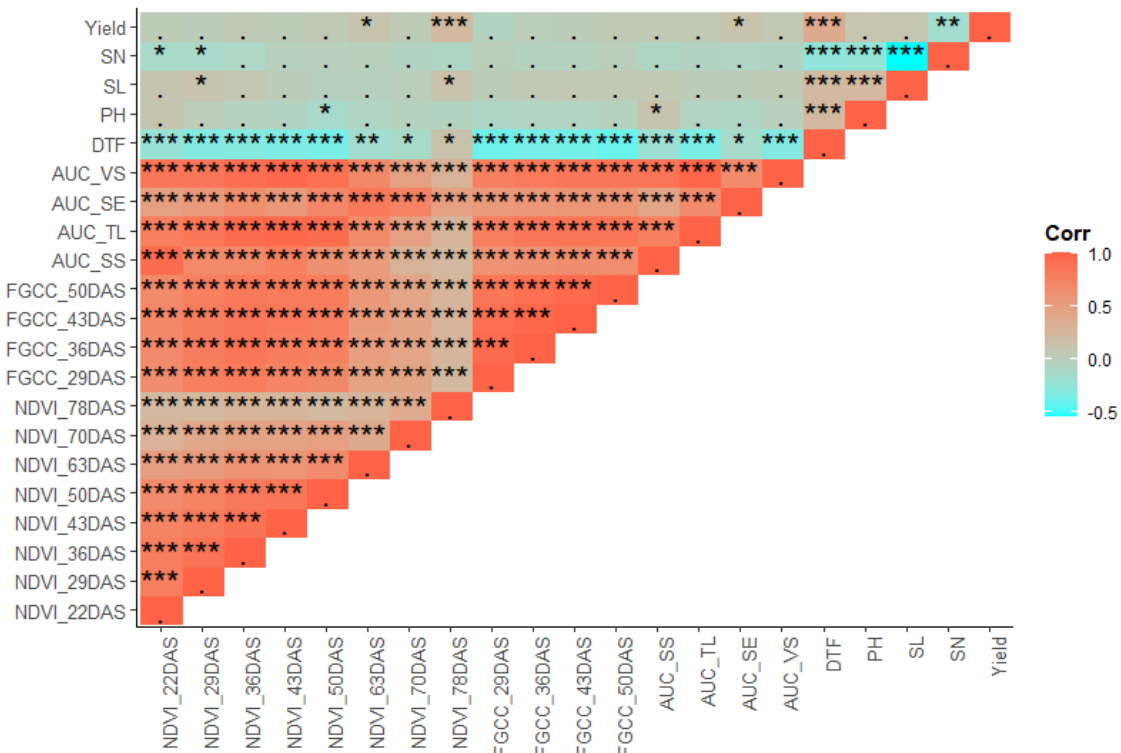

**Fig. 3.** Heatmap of trait by trait correlations in the 2020\_WW trial. Pearson’s correlation was computed for each pair of traits. The colour key represents the Pearson’s correlation coefficient. Level of significance \*:  $p < 0.05$ ; \*\*:  $p < 0.01$ ; \*\*\*:  $p < 0.001$ . The explanation for trait abbreviation can be found in Table 3.

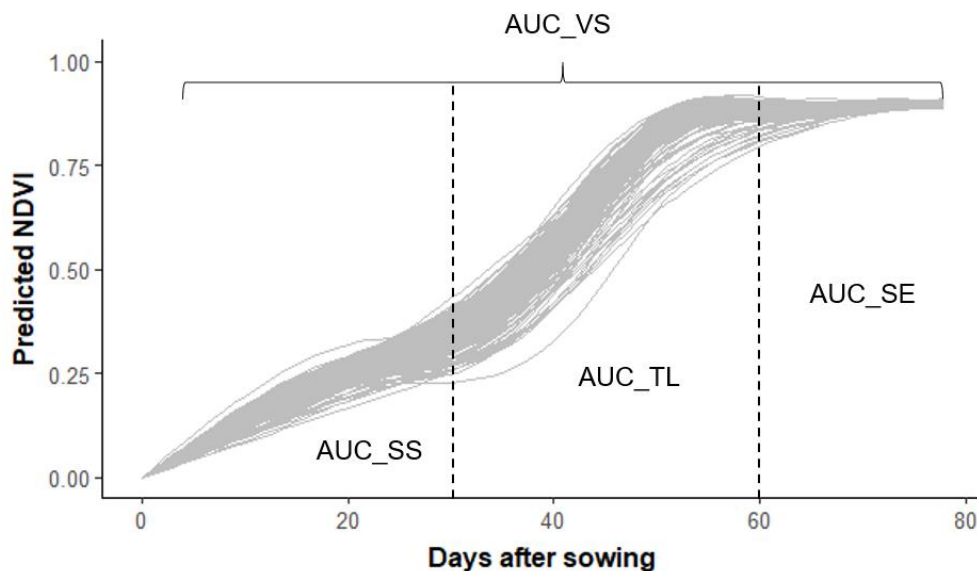

**Fig. 4.** Trajectories of time-series NDVI of all genotypes in the mapping population fitted with smoothing splines. The breakpoints 30 and 60 days after sowing were used to bin the whole range of simulated NDVI data. First phase = seedling stage (AUC\_SS, 0-30 DAS), second phase = tillering (AUC\_TL, 30-60 DAS), third phase = stem elongation (AUC\_SE, 60-78 DAS).

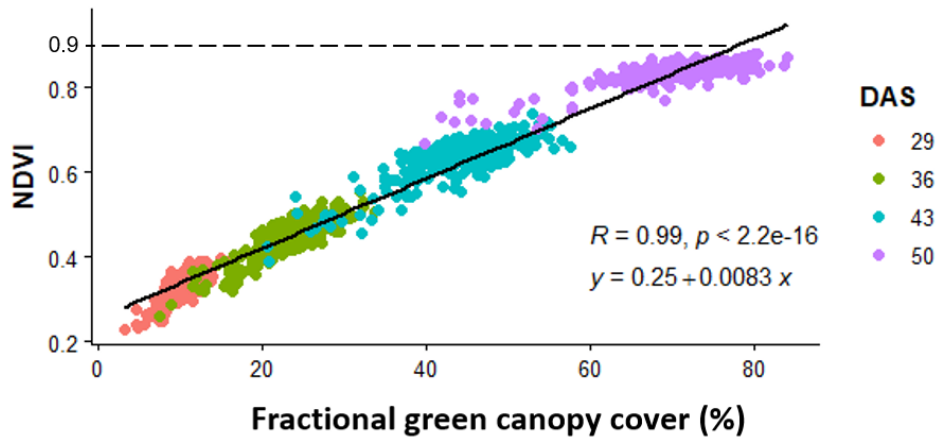

**Fig. 5.** Relationship between BLUEs of NDVI and fractional green canopy cover measured at 29, 36, 43 and 50 DAS.
